# Supplementary material
Source: HighWire-hosted journal article supplement (https://bmjopen.bmj.com/content/7/3/e014968)
Supplement: inline-supplementary-material-1 [file inline-supplementary-material-1.pdf]

**Supplementary table 1.** Sociodemographic characteristics of the 14,231 women included in the main analysis, stratified by tertiles of offspring's disposable income

|                                                        | Mothers of children in the highest tertile of income |    |          |              | Mothers of children in the middle tertile of income |    |          |              | Mothers of children in the lowest tertile of income |    |          |              |
|--------------------------------------------------------|------------------------------------------------------|----|----------|--------------|-----------------------------------------------------|----|----------|--------------|-----------------------------------------------------|----|----------|--------------|
|                                                        | n                                                    | %  | n deaths | Person-years | n                                                   | %  | n deaths | Person-years | n                                                   | %  | n deaths | Person-years |
|                                                        | 4635                                                 |    | 1412     | 33737        | 4799                                                |    | 1460     | 34423        | 4797                                                |    | 1420     | 34076        |
| <b>Offspring's education level</b>                     |                                                      |    |          |              |                                                     |    |          |              |                                                     |    |          |              |
| >14 years                                              | 2142                                                 | 46 | 554      | 16017        | 1616                                                | 34 | 426      | 11748        | 1272                                                | 27 | 306      | 8982         |
| 12-14 years                                            | 1586                                                 | 34 | 487      | 11406        | 1809                                                | 38 | 529      | 13122        | 1889                                                | 39 | 526      | 13594        |
| <12 years                                              | 907                                                  | 20 | 371      | 6314         | 1374                                                | 29 | 505      | 9553         | 1636                                                | 34 | 588      | 11501        |
| <b>Mothers' education level</b>                        |                                                      |    |          |              |                                                     |    |          |              |                                                     |    |          |              |
| Tertiary (>12 years)                                   | 1116                                                 | 24 | 252      | 8390         | 835                                                 | 17 | 192      | 6156         | 812                                                 | 17 | 182      | 5835         |
| Secondary (10-12 years)                                | 1658                                                 | 36 | 470      | 12166        | 1780                                                | 37 | 482      | 12930        | 1689                                                | 35 | 469      | 12035        |
| Primary (<10 years)                                    | 1861                                                 | 40 | 690      | 13181        | 2184                                                | 46 | 786      | 15336        | 2296                                                | 48 | 769      | 16205        |
| <b>Mothers' disposable income tertile</b>              |                                                      |    |          |              |                                                     |    |          |              |                                                     |    |          |              |
| Highest                                                | 1731                                                 | 37 | 395      | 13075        | 1412                                                | 29 | 328      | 10386        | 1296                                                | 27 | 282      | 9107         |
| Middle                                                 | 1416                                                 | 31 | 461      | 10148        | 1560                                                | 33 | 488      | 11201        | 1531                                                | 32 | 444      | 11100        |
| Lowest                                                 | 1488                                                 | 32 | 556      | 10514        | 1827                                                | 38 | 644      | 12835        | 1970                                                | 41 | 694      | 13869        |
| <b>Partners' education level</b>                       |                                                      |    |          |              |                                                     |    |          |              |                                                     |    |          |              |
| Tertiary (>12 years)                                   | 689                                                  | 15 | 154      | 5243         | 527                                                 | 11 | 114      | 3918         | 477                                                 | 10 | 97       | 3380         |
| Secondary (10-12 years)                                | 989                                                  | 21 | 238      | 7408         | 946                                                 | 20 | 214      | 7031         | 914                                                 | 19 | 225      | 6554         |
| Primary (<10 years)                                    | 900                                                  | 19 | 279      | 6636         | 1187                                                | 25 | 367      | 8607         | 1226                                                | 26 | 365      | 8945         |
| Missing                                                | 2057                                                 | 44 | 741      | 14450        | 2139                                                | 45 | 765      | 14867        | 2180                                                | 45 | 733      | 15197        |
| <b>Year of Diagnosis</b>                               |                                                      |    |          |              |                                                     |    |          |              |                                                     |    |          |              |
| 2001                                                   | 496                                                  | 11 | 189      | 3969         | 446                                                 | 9  | 176      | 3491         | 360                                                 | 8  | 130      | 2907         |
| 2002                                                   | 445                                                  | 10 | 172      | 3586         | 413                                                 | 9  | 159      | 3324         | 438                                                 | 9  | 150      | 3555         |
| 2003                                                   | 480                                                  | 10 | 165      | 3933         | 415                                                 | 9  | 152      | 3380         | 415                                                 | 9  | 154      | 3354         |
| 2004                                                   | 460                                                  | 10 | 166      | 3648         | 470                                                 | 10 | 186      | 3782         | 442                                                 | 9  | 150      | 3597         |
| 2005                                                   | 462                                                  | 10 | 173      | 3710         | 471                                                 | 10 | 170      | 3814         | 448                                                 | 9  | 170      | 3563         |
| 2006                                                   | 432                                                  | 9  | 149      | 3354         | 436                                                 | 9  | 144      | 3436         | 481                                                 | 10 | 160      | 3752         |
| 2007                                                   | 460                                                  | 10 | 131      | 3372         | 489                                                 | 10 | 136      | 3569         | 473                                                 | 10 | 142      | 3434         |
| 2008                                                   | 443                                                  | 10 | 96       | 2958         | 533                                                 | 11 | 117      | 3557         | 526                                                 | 11 | 131      | 3442         |
| 2009                                                   | 469                                                  | 10 | 86       | 2749         | 533                                                 | 11 | 108      | 3134         | 550                                                 | 11 | 111      | 3184         |
| 2010                                                   | 488                                                  | 11 | 85       | 2458         | 593                                                 | 12 | 112      | 2935         | 664                                                 | 14 | 122      | 3288         |
| <b>Country of birth</b>                                |                                                      |    |          |              |                                                     |    |          |              |                                                     |    |          |              |
| Sweden                                                 | 4211                                                 | 91 | 1289     | 30596        | 4335                                                | 90 | 1315     | 31163        | 4238                                                | 88 | 1246     | 30086        |
| Nordic countries                                       | 245                                                  | 5  | 70       | 1789         | 273                                                 | 6  | 84       | 1910         | 344                                                 | 7  | 108      | 2484         |
| Europe                                                 | 139                                                  | 3  | 42       | 1052         | 134                                                 | 3  | 46       | 968          | 144                                                 | 3  | 41       | 1009         |
| Outside Europe                                         | 40                                                   | 1  | 11       | 300          | 57                                                  | 1  | 15       | 381          | 71                                                  | 1  | 25       | 498          |
| <b>Marital status</b>                                  |                                                      |    |          |              |                                                     |    |          |              |                                                     |    |          |              |
| Married/cohabiting                                     | 2652                                                 | 57 | 706      | 19805        | 2695                                                | 56 | 713      | 19817        | 2687                                                | 56 | 702      | 19423        |
| Single                                                 | 828                                                  | 18 | 259      | 5818         | 940                                                 | 20 | 296      | 6540         | 1022                                                | 21 | 335      | 6919         |
| Widowed                                                | 1155                                                 | 25 | 447      | 8114         | 1164                                                | 24 | 451      | 8065         | 1088                                                | 23 | 383      | 7734         |
| <b>Number of children</b>                              |                                                      |    |          |              |                                                     |    |          |              |                                                     |    |          |              |
| 1                                                      | 1114                                                 | 24 | 358      | 8062         | 1195                                                | 25 | 406      | 8514         | 1200                                                | 25 | 405      | 8401         |
| 2                                                      | 2158                                                 | 47 | 625      | 15762        | 2120                                                | 44 | 620      | 15199        | 2140                                                | 45 | 593      | 15191        |
| 3+                                                     | 1363                                                 | 29 | 429      | 9913         | 1484                                                | 31 | 434      | 10709        | 1457                                                | 30 | 422      | 10483        |
| <b>Sex of child</b>                                    |                                                      |    |          |              |                                                     |    |          |              |                                                     |    |          |              |
| Males                                                  | 2723                                                 | 59 | 789      | 19737        | 2281                                                | 48 | 685      | 16161        | 1811                                                | 38 | 594      | 12922        |
| Females                                                | 1912                                                 | 41 | 623      | 14000        | 2518                                                | 52 | 775      | 18261        | 2986                                                | 62 | 826      | 21153        |
| <b>Proximity of residence between mother and child</b> |                                                      |    |          |              |                                                     |    |          |              |                                                     |    |          |              |
| <50km                                                  | 2931                                                 | 63 | 914      | 21242        | 3411                                                | 71 | 1061     | 24387        | 3592                                                | 75 | 1059     | 25469        |
| 50-150km                                               | 671                                                  | 14 | 193      | 4845         | 601                                                 | 13 | 175      | 4447         | 561                                                 | 12 | 170      | 4043         |
| >150km                                                 | 1033                                                 | 22 | 305      | 9713         | 796                                                 | 15 | 229      | 5766         | 346                                                 | 9  | 140      | 2324         |

**Supplementary table 2A.** Sociodemographic characteristics of the 8,616 women with information available on clinical stage at diagnosis, stratified by offspring's education level

|                                                        | Mothers of children with >14 years of education |    |          |              | Mothers of children with 12-14 years of education |    |          |              | Mothers of children with <12 years of education |    |          |              |
|--------------------------------------------------------|-------------------------------------------------|----|----------|--------------|---------------------------------------------------|----|----------|--------------|-------------------------------------------------|----|----------|--------------|
|                                                        | n                                               | %  | n deaths | Person-years | n                                                 | %  | n deaths | Person-years | n                                               | %  | n deaths | Person-years |
|                                                        | 3184                                            |    | 678      | 21954        | 3214                                              |    | 814      | 21820        | 2218                                            |    | 720      | 14699        |
| <b>Offspring's disposable income tertile</b>           |                                                 |    |          |              |                                                   |    |          |              |                                                 |    |          |              |
| Highest                                                | 1283                                            | 40 | 279      | 9022         | 928                                               | 29 | 246      | 6296         | 477                                             | 22 | 167      | 3164         |
| Middle                                                 | 1038                                            | 33 | 220      | 7204         | 1107                                              | 34 | 284      | 7553         | 801                                             | 36 | 250      | 5348         |
| Lowest                                                 | 863                                             | 27 | 179      | 5728         | 1179                                              | 37 | 284      | 7972         | 940                                             | 42 | 303      | 6186         |
| <b>Mothers' education level</b>                        |                                                 |    |          |              |                                                   |    |          |              |                                                 |    |          |              |
| Tertiary (>12 years)                                   | 1207                                            | 38 | 231      | 8372         | 519                                               | 16 | 117      | 3587         | 143                                             | 6  | 35       | 987          |
| Secondary (10-12 years)                                | 1134                                            | 36 | 236      | 7825         | 1346                                              | 42 | 323      | 9172         | 784                                             | 35 | 223      | 5276         |
| Primary (<10 years)                                    | 843                                             | 26 | 211      | 5757         | 1349                                              | 42 | 374      | 9061         | 1291                                            | 58 | 462      | 8436         |
| <b>Mothers' disposable income tertile</b>              |                                                 |    |          |              |                                                   |    |          |              |                                                 |    |          |              |
| Highest                                                | 1443                                            | 45 | 280      | 10046        | 1067                                              | 33 | 212      | 7328         | 524                                             | 24 | 126      | 3585         |
| Middle                                                 | 896                                             | 28 | 192      | 6167         | 1044                                              | 32 | 283      | 7130         | 778                                             | 35 | 275      | 5090         |
| Lowest                                                 | 845                                             | 27 | 206      | 5741         | 1103                                              | 34 | 319      | 7362         | 916                                             | 41 | 319      | 6024         |
| <b>Partners' education level</b>                       |                                                 |    |          |              |                                                   |    |          |              |                                                 |    |          |              |
| Tertiary (>12 years)                                   | 707                                             | 22 | 116      | 4969         | 324                                               | 10 | 68       | 2226         | 93                                              | 4  | 29       | 587          |
| Secondary (10-12 years)                                | 732                                             | 23 | 139      | 5063         | 715                                               | 22 | 141      | 4973         | 348                                             | 16 | 85       | 2398         |
| Primary (<10 years)                                    | 492                                             | 15 | 118      | 3396         | 751                                               | 23 | 193      | 5092         | 640                                             | 29 | 176      | 4440         |
| Missing                                                | 1253                                            | 39 | 305      | 8526         | 1424                                              | 44 | 412      | 9529         | 1137                                            | 51 | 430      | 7274         |
| <b>Year of Diagnosis</b>                               |                                                 |    |          |              |                                                   |    |          |              |                                                 |    |          |              |
| 2004                                                   | 304                                             | 10 | 86       | 2596         | 399                                               | 12 | 139      | 3228         | 282                                             | 13 | 115      | 2235         |
| 2005                                                   | 332                                             | 10 | 108      | 2796         | 362                                               | 11 | 119      | 3024         | 293                                             | 13 | 117      | 2267         |
| 2006                                                   | 342                                             | 11 | 93       | 2836         | 366                                               | 11 | 114      | 2921         | 288                                             | 13 | 116      | 2173         |
| 2007                                                   | 412                                             | 13 | 82       | 3194         | 410                                               | 13 | 108      | 3029         | 302                                             | 14 | 114      | 2071         |
| 2008                                                   | 547                                             | 17 | 112      | 3683         | 494                                               | 15 | 119      | 3235         | 333                                             | 15 | 84       | 2185         |
| 2009                                                   | 597                                             | 19 | 99       | 3554         | 527                                               | 16 | 101      | 3088         | 347                                             | 16 | 85       | 1982         |
| 2010                                                   | 650                                             | 20 | 98       | 3294         | 656                                               | 20 | 114      | 3295         | 373                                             | 17 | 89       | 1785         |
| <b>Country of birth</b>                                |                                                 |    |          |              |                                                   |    |          |              |                                                 |    |          |              |
| Sweden                                                 | 2852                                            | 90 | 610      | 19653        | 2879                                              | 90 | 729      | 19549        | 1998                                            | 90 | 643      | 13227        |
| Nordic countries                                       | 171                                             | 5  | 35       | 1174         | 203                                               | 6  | 53       | 1371         | 142                                             | 6  | 46       | 971          |
| Europe                                                 | 108                                             | 3  | 19       | 791          | 98                                                | 3  | 26       | 658          | 54                                              | 2  | 25       | 351          |
| Outside Europe                                         | 53                                              | 2  | 14       | 337          | 34                                                | 1  | 6        | 242          | 24                                              | 1  | 6        | 149          |
| <b>Marital status</b>                                  |                                                 |    |          |              |                                                   |    |          |              |                                                 |    |          |              |
| Married/cohabiting                                     | 1963                                            | 62 | 379      | 13653        | 1830                                              | 57 | 421      | 12557        | 1097                                            | 49 | 297      | 7519         |
| Single                                                 | 605                                             | 19 | 136      | 4042         | 677                                               | 21 | 180      | 4470         | 589                                             | 27 | 211      | 3782         |
| Widowed                                                | 616                                             | 19 | 163      | 4259         | 707                                               | 22 | 213      | 4793         | 532                                             | 24 | 212      | 3397         |
| <b>Number of children</b>                              |                                                 |    |          |              |                                                   |    |          |              |                                                 |    |          |              |
| 1                                                      | 542                                             | 17 | 111      | 3757         | 679                                               | 21 | 172      | 4614         | 794                                             | 36 | 272      | 5281         |
| 2                                                      | 1557                                            | 49 | 330      | 10715        | 1538                                              | 48 | 377      | 10458        | 927                                             | 42 | 278      | 6159         |
| 3+                                                     | 1085                                            | 34 | 237      | 7482         | 997                                               | 31 | 265      | 6748         | 497                                             | 22 | 170      | 3259         |
| <b>Sex of child</b>                                    |                                                 |    |          |              |                                                   |    |          |              |                                                 |    |          |              |
| Males                                                  | 1434                                            | 45 | 316      | 9870         | 1477                                              | 46 | 370      | 10041        | 1185                                            | 53 | 392      | 7792         |
| Females                                                | 1750                                            | 55 | 362      | 12085        | 1737                                              | 54 | 444      | 11779        | 1033                                            | 47 | 328      | 6907         |
| <b>Proximity of residence between mother and child</b> |                                                 |    |          |              |                                                   |    |          |              |                                                 |    |          |              |
| <50km                                                  | 1837                                            | 58 | 382      | 12552        | 2369                                              | 74 | 595      | 16107        | 1840                                            | 83 | 583      | 12347        |
| 50-150km                                               | 556                                             | 17 | 116      | 3948         | 369                                               | 11 | 99       | 2492         | 186                                             | 8  | 67       | 1158         |
| >150km                                                 | 791                                             | 25 | 180      | 5454         | 476                                               | 15 | 120      | 3222         | 192                                             | 9  | 70       | 1194         |
| <b>Clinical cancer stage at diagnosis</b>              |                                                 |    |          |              |                                                   |    |          |              |                                                 |    |          |              |
| 1                                                      | 1892                                            | 59 | 204      | 13769        | 1835                                              | 57 | 261      | 13170        | 1205                                            | 54 | 252      | 8624         |
| 2                                                      | 1102                                            | 35 | 342      | 7396         | 1164                                              | 36 | 405      | 7752         | 844                                             | 38 | 333      | 5442         |
| 3                                                      | 109                                             | 3  | 61       | 566          | 125                                               | 4  | 69       | 668          | 95                                              | 4  | 72       | 428          |
| 4                                                      | 81                                              | 3  | 71       | 223          | 90                                                | 3  | 79       | 229          | 74                                              | 3  | 63       | 205          |

**Supplementary table 2B.** Sociodemographic characteristics of the 8,616 women with information available on clinical stage at diagnosis, stratified by tertile of offspring's disposable income

|                                                        | Mothers of children in the highest tertile of income |    |          |              | Mothers of children in the middle tertile of income |    |          |              | Mothers of children in the lowest tertile of income |    |          |              |
|--------------------------------------------------------|------------------------------------------------------|----|----------|--------------|-----------------------------------------------------|----|----------|--------------|-----------------------------------------------------|----|----------|--------------|
|                                                        | n                                                    | %  | n deaths | Person-years | n                                                   | %  | n deaths | Person-years | n                                                   | %  | n deaths | Person-years |
|                                                        | 2688                                                 |    | 692      | 18482        | 2946                                                |    | 754      | 20105        | 2982                                                |    | 766      | 19886        |
| <b>Offspring's education level</b>                     |                                                      |    |          |              |                                                     |    |          |              |                                                     |    |          |              |
| >14 years                                              | 1283                                                 | 48 | 279      | 9022         | 1038                                                | 35 | 220      | 7204         | 863                                                 | 29 | 179      | 5728         |
| 12-14 years                                            | 928                                                  | 35 | 246      | 6296         | 1107                                                | 38 | 284      | 7553         | 1179                                                | 40 | 284      | 7972         |
| <12 years                                              | 477                                                  | 18 | 167      | 3164         | 801                                                 | 27 | 250      | 5348         | 940                                                 | 32 | 303      | 6186         |
| <b>Mothers' education level</b>                        |                                                      |    |          |              |                                                     |    |          |              |                                                     |    |          |              |
| Tertiary (>12 years)                                   | 729                                                  | 27 | 150      | 5153         | 571                                                 | 19 | 119      | 3949         | 569                                                 | 19 | 114      | 3844         |
| Secondary (10-12 years)                                | 1007                                                 | 37 | 242      | 6927         | 1156                                                | 39 | 270      | 8022         | 1101                                                | 37 | 270      | 7323         |
| Primary (<10 years)                                    | 952                                                  | 35 | 300      | 6402         | 1219                                                | 41 | 365      | 8134         | 1312                                                | 44 | 382      | 8718         |
| <b>Mothers' disposable income tertile</b>              |                                                      |    |          |              |                                                     |    |          |              |                                                     |    |          |              |
| Highest                                                | 1090                                                 | 41 | 229      | 7658         | 999                                                 | 34 | 206      | 6991         | 945                                                 | 32 | 183      | 6310         |
| Middle                                                 | 814                                                  | 30 | 222      | 5532         | 934                                                 | 32 | 259      | 6331         | 970                                                 | 33 | 269      | 6523         |
| Lowest                                                 | 784                                                  | 29 | 241      | 5292         | 1013                                                | 34 | 289      | 6783         | 1067                                                | 36 | 314      | 7053         |
| <b>Partners' education level</b>                       |                                                      |    |          |              |                                                     |    |          |              |                                                     |    |          |              |
| Tertiary (>12 years)                                   | 428                                                  | 16 | 87       | 3032         | 347                                                 | 12 | 66       | 2414         | 349                                                 | 12 | 60       | 2336         |
| Secondary (10-12 years)                                | 584                                                  | 22 | 120      | 4136         | 606                                                 | 21 | 110      | 4272         | 605                                                 | 20 | 135      | 4027         |
| Primary (<10 years)                                    | 494                                                  | 18 | 123      | 3465         | 688                                                 | 23 | 181      | 4701         | 701                                                 | 24 | 183      | 4761         |
| Missing                                                | 1182                                                 | 44 | 362      | 7849         | 1305                                                | 44 | 397      | 8718         | 1327                                                | 45 | 388      | 8762         |
| <b>Year of Diagnosis</b>                               |                                                      |    |          |              |                                                     |    |          |              |                                                     |    |          |              |
| 2004                                                   | 330                                                  | 12 | 113      | 2664         | 345                                                 | 12 | 130      | 2823         | 310                                                 | 10 | 97       | 2573         |
| 2005                                                   | 336                                                  | 13 | 118      | 2782         | 347                                                 | 12 | 113      | 2880         | 304                                                 | 10 | 113      | 2425         |
| 2006                                                   | 331                                                  | 12 | 113      | 2595         | 319                                                 | 11 | 98       | 2574         | 346                                                 | 12 | 112      | 2761         |
| 2007                                                   | 371                                                  | 14 | 100      | 2747         | 388                                                 | 13 | 100      | 2870         | 365                                                 | 12 | 104      | 2677         |
| 2008                                                   | 405                                                  | 15 | 90       | 2693         | 481                                                 | 16 | 106      | 3206         | 488                                                 | 16 | 119      | 3204         |
| 2009                                                   | 442                                                  | 16 | 79       | 2609         | 499                                                 | 17 | 101      | 2941         | 530                                                 | 18 | 105      | 3075         |
| 2010                                                   | 473                                                  | 18 | 79       | 2392         | 567                                                 | 19 | 106      | 2812         | 639                                                 | 21 | 116      | 3170         |
| <b>Country of birth</b>                                |                                                      |    |          |              |                                                     |    |          |              |                                                     |    |          |              |
| Sweden                                                 | 2435                                                 | 91 | 636      | 16690        | 2644                                                | 90 | 663      | 18110        | 2650                                                | 89 | 683      | 17629        |
| Nordic countries                                       | 143                                                  | 5  | 30       | 1006         | 179                                                 | 6  | 52       | 1188         | 194                                                 | 7  | 52       | 1323         |
| Europe                                                 | 82                                                   | 3  | 19       | 590          | 83                                                  | 3  | 30       | 560          | 95                                                  | 3  | 21       | 650          |
| Outside Europe                                         | 28                                                   | 1  | 7        | 196          | 40                                                  | 1  | 9        | 248          | 43                                                  | 1  | 10       | 284          |
| <b>Marital status</b>                                  |                                                      |    |          |              |                                                     |    |          |              |                                                     |    |          |              |
| Married/cohabiting                                     | 1552                                                 | 58 | 350      | 10944        | 1651                                                | 56 | 363      | 11431        | 1687                                                | 57 | 384      | 11355        |
| Single                                                 | 540                                                  | 20 | 151      | 3546         | 635                                                 | 22 | 170      | 4266         | 696                                                 | 23 | 206      | 4482         |
| Widowed                                                | 596                                                  | 22 | 191      | 3992         | 660                                                 | 22 | 221      | 4408         | 599                                                 | 20 | 176      | 4049         |
| <b>Number of children</b>                              |                                                      |    |          |              |                                                     |    |          |              |                                                     |    |          |              |
| 1                                                      | 612                                                  | 23 | 155      | 4216         | 684                                                 | 23 | 189      | 4706         | 719                                                 | 24 | 211      | 4729         |
| 2                                                      | 1283                                                 | 48 | 329      | 8806         | 1351                                                | 46 | 326      | 9231         | 1388                                                | 47 | 330      | 9295         |
| 3+                                                     | 793                                                  | 30 | 208      | 5460         | 911                                                 | 31 | 239      | 6167         | 875                                                 | 29 | 225      | 5862         |
| <b>Sex of child</b>                                    |                                                      |    |          |              |                                                     |    |          |              |                                                     |    |          |              |
| Males                                                  | 1644                                                 | 61 | 408      | 11246        | 1416                                                | 48 | 367      | 9531         | 1036                                                | 35 | 303      | 6927         |
| Females                                                | 1044                                                 | 39 | 284      | 7236         | 1530                                                | 52 | 387      | 10574        | 1946                                                | 65 | 463      | 12959        |
| <b>Proximity of residence between mother and child</b> |                                                      |    |          |              |                                                     |    |          |              |                                                     |    |          |              |
| <50km                                                  | 1718                                                 | 64 | 443      | 11852        | 2093                                                | 71 | 551      | 14230        | 2235                                                | 75 | 566      | 14924        |
| 50-150km                                               | 405                                                  | 15 | 103      | 2731         | 360                                                 | 12 | 83       | 2538         | 346                                                 | 12 | 96       | 2329         |
| >150km                                                 | 565                                                  | 21 | 146      | 3900         | 493                                                 | 17 | 120      | 3337         | 401                                                 | 13 | 104      | 2633         |
| <b>Clinical cancer stage at diagnosis</b>              |                                                      |    |          |              |                                                     |    |          |              |                                                     |    |          |              |
| 1                                                      | 1499                                                 | 56 | 216      | 10992        | 1730                                                | 59 | 246      | 12525        | 1703                                                | 57 | 255      | 12047        |
| 2                                                      | 1018                                                 | 38 | 354      | 6762         | 1013                                                | 34 | 369      | 6752         | 1079                                                | 36 | 357      | 7076         |
| 3                                                      | 108                                                  | 4  | 66       | 540          | 120                                                 | 4  | 66       | 629          | 101                                                 | 3  | 70       | 494          |
| 4                                                      | 63                                                   | 2  | 56       | 189          | 83                                                  | 3  | 73       | 200          | 99                                                  | 3  | 84       | 269          |

**Supplementary table 3.** Effect modification by mothers' education and disposable income on the additive scale, quantified using the relative excess risk due to interaction<sup>a</sup>

| <b>Mothers with primary education</b>        |                        | <b>Mothers with secondary education</b>    |                       | <b>Mothers with tertiary education</b>     |                       |
|----------------------------------------------|------------------------|--------------------------------------------|-----------------------|--------------------------------------------|-----------------------|
| EHR (95% CI) <sup>b</sup>                    |                        | EHR (95% CI) <sup>b</sup>                  | RERI (95% CI)         | EHR (95% CI) <sup>b</sup>                  | RERI (95% CI)         |
| <b>Offspring's education level</b>           |                        |                                            |                       |                                            |                       |
| >14 years                                    | Reference <sup>c</sup> | 1.02 (0.70 to 1.49)                        |                       | 1.29 (0.89 to 1.87)                        |                       |
| 12-14 years                                  | 1.31 (0.94 to 1.81)    | 1.16 (0.82 to 1.64)                        | -0.17 (-1.61 to 1.28) | 1.64 (1.10 to 2.44)                        | 0.05 (-0.58 to 0.68)  |
| <12 years                                    | 1.85 (1.35 to 2.52)    | 1.72 (1.23 to 2.40)                        | -0.16 (-0.71 to 0.40) | 1.49 (0.85 to 2.63)                        | -0.64 (-1.58 to 0.29) |
| <b>Mothers in highest tertile of income</b>  |                        | <b>Mothers in middle tertile of income</b> |                       | <b>Mothers in lowest tertile of income</b> |                       |
| EHR (95% CI) <sup>d</sup>                    |                        | EHR (95% CI) <sup>d</sup>                  | RERI (95% CI)         | EHR (95% CI) <sup>d</sup>                  | RERI (95% CI)         |
| <b>Offspring's disposable income tertile</b> |                        |                                            |                       |                                            |                       |
| Highest                                      | Reference <sup>c</sup> | 1.55 (1.10 to 2.18)                        |                       | 1.69 (1.19 to 2.39)                        |                       |
| Middle                                       | 1.19 (0.82 to 1.73)    | 1.57 (1.12 to 2.19)                        | -0.17 (-1.84 to 1.50) | 1.55 (1.10 to 2.19)                        | -0.33 (-2.08 to 1.43) |
| Lowest                                       | 1.27 (0.87 to 1.85)    | 1.37 (0.97 to 1.95)                        | -0.44 (-1.10 to 0.21) | 1.88 (1.35 to 2.61)                        | -0.08 (-0.69 to 0.53) |

<sup>a</sup> The relative excess risk due to interaction (RERI) is calculated as the excess hazard ratio (EHR) when both the exposure and potential modifying factor (e.g. offspring with 12-14 years of education and mothers with secondary education) are present minus the EHR if factor A (e.g. offspring with 12-14 years of education) is present and factor B (e.g. mothers with secondary education) is absent minus the EHR when factor A is absent and factor B is present plus 1 (i.e.  $RERI = EHR_{A+B+} - EHR_{A+B-} - EHR_{A-B+} + 1$ ). If 95% confidence intervals (95% CIs) around a RERI estimate do not include zero then effect modification on the additive scale is suggested.

<sup>b</sup> Adjusted for mothers' income (tertile), offspring's income (tertile), partners' education level, year of diagnosis, mothers' country of birth, marital status, number of children, sex of child, age of child in year prior to mother's diagnosis, proximity of residence between mother and child.

<sup>c</sup> Variables were recoded so the stratum with the lowest risk, when both the exposure and potential modifying factor were considered, was the reference category. All EHR are relative to this reference category. EHRs are the ratios of excess hazard of death accounting for the expected survival in the general population by age, sex, calendar year and education level.

<sup>d</sup> Adjusted for mothers' education level, offspring's education level, partners' education level, year of diagnosis, mothers' country of birth, marital status, number of children, sex of child, age of child in year prior to mother's diagnosis, proximity of residence between mother and child.

**Supplementary table 4.** Effect modification by mothers' education and disposable income on the multiplicative scale, quantified using ratios of relative risks<sup>a</sup>

|                                       | Mothers with tertiary education        | Mothers with secondary education    |                           | Mothers with primary education      |                           |
|---------------------------------------|----------------------------------------|-------------------------------------|---------------------------|-------------------------------------|---------------------------|
|                                       | EHR <sup>b</sup> (95% CI) <sup>c</sup> | EHR (95% CI) <sup>c</sup>           | RRR (95% CI) <sup>d</sup> | EHR (95% CI) <sup>c</sup>           | RRR (95% CI) <sup>e</sup> |
| Offspring’s education level           |                                        |                                     |                           |                                     |                           |
| >14 years                             | Reference                              | Reference                           |                           | Reference                           |                           |
| 12-14 years                           | 1.36 (0.95 to 1.95)                    | 1.08 (0.78 to 1.50)                 | 0.79 (0.49 to 1.29)       | 1.38 (0.99 to 1.93)                 | 1.02 (0.62 to 1.66)       |
| <12 years                             | 1.24 (0.68 to 2.27)                    | 1.59 (1.14 to 2.23)                 | 1.28 (0.64 to 2.56)       | 1.86 (1.34 to 2.58)                 | 1.50 (0.76 to 2.98)       |
|                                       | Mothers in highest tertile of income   | Mothers in middle tertile of income |                           | Mothers in lowest tertile of income |                           |
|                                       | EHR (95% CI) <sup>f</sup>              | EHR (95% CI) <sup>f</sup>           | RRR (95% CI) <sup>g</sup> | EHR (95% CI) <sup>f</sup>           | RRR (95% CI) <sup>h</sup> |
| Offspring’s disposable income tertile |                                        |                                     |                           |                                     |                           |
| Highest                               | Reference                              | Reference                           |                           | Reference                           |                           |
| Middle                                | 1.27 (0.87 to 1.87)                    | 0.97 (0.74 to 1.28)                 | 0.76 (0.48 to 1.22)       | 0.93 (0.72 to 1.21)                 | 0.73 (0.46 to 1.16)       |
| Lowest                                | 1.38 (0.92 to 2.05)                    | 0.86 (0.63 to 1.16)                 | 0.62 (0.38 to 1.03)       | 1.14 (0.88 to 1.46)                 | 0.82 (0.51 to 1.33)       |

<sup>a</sup> If 95% confidence intervals (95% CIs) around a ratio of relative risk (RRR) do not include one then effect modification on the multiplicative scale is suggested.

<sup>b</sup> Excess hazard ratios (EHR) are the ratios of excess hazard of death accounting for the expected survival in the general population by age, sex, calendar year and education level.

<sup>c</sup> Adjusted for mothers' income (tertile), offspring's income (tertile), partners' education level, year of diagnosis, mothers' country of birth, marital status, number of children, sex of child, age of child in year prior to mother's diagnosis, proximity of residence between mother and child.

<sup>d</sup> EHR for each level of offspring's education among mothers with secondary education compared to the EHR for each level of offspring's education among mothers with tertiary education.

<sup>e</sup> EHR for each level of offspring's education among mothers with primary education compared to the EHR for each level of offspring's education among mothers with tertiary education.

<sup>f</sup> Adjusted for mothers' education level, offspring's education level, partners' education level, year of diagnosis, mothers' country of birth, marital status, number of children, sex of child, age of child in year prior to mother's diagnosis, proximity of residence between mother and child.

<sup>g</sup> EHR for each tertile of offspring's disposable income among mothers in the middle tertile of income compared to the EHR for each tertile of offspring's disposable income among mothers in the highest tertile of income.

<sup>h</sup> EHR for each tertile of offspring's disposable income among mothers with in the lowest tertile of income compared to the EHR for each tertile of offspring's disposable income among mothers in the highest tertile of income.

**Supplementary table 5.** Effect modification by clinical stage at diagnosis on the additive scale, quantified using the relative excess risk due to interaction <sup>a</sup>

|                                              | Stage 1<br>HR (95% CI) | Stage 2<br>HR (95% CI) | RERI (95% CI)         | Stage 3 & 4 combined<br>HR (95% CI) | RERI (95% CI)         |
|----------------------------------------------|------------------------|------------------------|-----------------------|-------------------------------------|-----------------------|
| <b>Offspring's education level</b>           |                        |                        |                       |                                     |                       |
| >14 years                                    | Reference <sup>b</sup> | 2.83 (2.38 to 3.37)    |                       | 9.74 (7.81 to 12.15)                |                       |
| 12-14 years                                  | 1.29 (1.07 to 1.55)    | 3.06 (2.58 to 3.64)    | -0.06 (-0.53 to 0.41) | 9.68 (7.81 to 12.00)                | -0.35 (-2.67 to 1.97) |
| <12 years                                    | 1.77 (1.46 to 2.15)    | 3.32 (2.76 to 4.00)    | -0.54 (-1.09 to 0.01) | 11.43 (9.10 to 14.35)               | 0.91 (-1.72 to 3.55)  |
| <b>Offspring's disposable income tertile</b> |                        |                        |                       |                                     |                       |
| Highest                                      | Reference <sup>b</sup> | 2.39 (2.02 to 2.84)    |                       | 7.47 (5.97 to 9.34)                 |                       |
| Middle                                       | 1.01 (0.84 to 1.21)    | 2.46 (2.08 to 2.92)    | 0.06 (-0.34 to 0.46)  | 7.41 (5.97 to 9.18)                 | -0.07 (-1.90 to 1.76) |
| Lowest                                       | 1.13 (0.94 to 1.35)    | 2.43 (2.04 to 2.88)    | -0.09 (-0.50 to 0.32) | 9.47 (7.66 to 11.69)                | 1.87 (-0.17 to 3.91)  |

<sup>a</sup> The relative excess risk due to interaction (RERI) is calculated as the hazard ratio (HR) when both the exposure and potential modifying factor (e.g. offspring with 12-14 years of education and stage 2 at diagnosis) are present minus the HR if factor A (e.g. offspring with 12-14 years of education) is present and factor B (e.g. stage 2 at diagnosis) is absent minus the HR when factor A is absent and factor B is present plus 1 (i.e.  $RERI = HR_{A+B+} - HR_{A+B-} - HR_{A-B+} + 1$ ). If 95% confidence intervals (95% CIs) around a RERI estimate do not include zero then effect modification on the additive scale is suggested.

<sup>b</sup> Variables were recoded so the stratum with the lowest risk, when both the exposure and potential modifying factor were considered, was the reference category. All HRs are relative to this reference category.

All models adjusted for mothers' income (tertile), mothers' education level, partners' education level, year of diagnosis, mothers' country of birth, marital status, number of children, sex of child, age of child in year prior to mother's diagnosis, proximity of residence between mother and child, mutually adjusted for offspring's disposable income and offspring's education level.

NB. Flexible parametric models did not converge when models included stage at diagnosis. As such, we used Cox regression to estimate HRs and 95% CIs of all-cause mortality, rather than relative survival, for these analyses.

**Supplementary table 6.** Effect modification by clinical stage at diagnosis on the multiplicative scale, quantified using the ratio of relative risks between clinical stages <sup>a</sup>

|                                              | Stage 1<br>HR (95% CI) | Stage 2<br>HR (95% CI) | RRR(95% CI) <sup>b</sup> | Stage 3 & 4 combined<br>HR (95% CI) | RRR (95% CI) <sup>c</sup> |
|----------------------------------------------|------------------------|------------------------|--------------------------|-------------------------------------|---------------------------|
| <b>Offspring's education level</b>           |                        |                        |                          |                                     |                           |
| >14 years                                    | Reference              | Reference              |                          | Reference                           |                           |
| 12-14 years                                  | 1.25 (1.03 to 1.52)    | 1.09 (0.93 to 1.26)    | 0.87 (0.68 to 1.12)      | 0.91 (0.70 to 1.18)                 | 0.73 (0.53 to 1.01)       |
| <12 years                                    | 1.71 (1.38 to 2.11)    | 1.16 (0.97 to 1.39)    | 0.67 (0.51 to 0.90)      | 1.00 (0.74 to 1.35)                 | 0.59 (0.41 to 0.85)       |
| <b>Offspring's disposable income tertile</b> |                        |                        |                          |                                     |                           |
| Highest                                      | Reference              | Reference              |                          | Reference                           |                           |
| Middle                                       | 0.99 (0.82 to 1.19)    | 1.05 (0.90 to 1.22)    | 1.06 (0.83 to 1.35)      | 0.96 (0.74 to 1.23)                 | 0.97 (0.71 to 1.33)       |
| Lowest                                       | 1.12 (0.92 to 1.36)    | 1.02 (0.87 to 1.20)    | 0.91 (0.71 to 1.17)      | 1.24 (0.96 to 1.60)                 | 1.11 (0.80 to 1.53)       |

<sup>a</sup> If 95% confidence intervals (95% CIs) around a ratio of relative risk (RRR) do not include 1 then effect modification on the multiplicative scale is suggested.

<sup>b</sup> Hazard ratios (HR) for each level of offspring's education among mothers diagnosed with stage 2 disease compared to the HR for each level of offspring's education among mothers diagnosed with stage 1 disease or HR for each tertile of offspring's disposable income among mothers diagnosed with stage 2 disease compared to the HR for each tertile of offspring's disposable income among mothers diagnosed with stage 1 disease.

<sup>c</sup> HR for each level of offspring's education among mothers diagnosed with stage 3 or 4 disease compared to the HR for each level of offspring's education among mothers diagnosed with stage 1 disease or HR for each tertile of offspring's disposable income among mothers diagnosed with stage 3 or 4 disease compared to the HR for each tertile of offspring's disposable income among mothers diagnosed with stage 1 disease.

All models adjusted for mothers' income (tertile), mothers' education level, partners' education level, year of diagnosis, mothers' country of birth, marital status, number of children, sex of child, age of child in year prior to mother's diagnosis, proximity of residence between mother and child, mutually adjusted for offspring's disposable income and offspring's education level.

NB. Flexible parametric models did not converge when models included stage at diagnosis. As such, we used Cox regression to estimate HRs and 95% CIs of all-cause mortality, rather than relative survival, for these analyses.

**Supplementary table 7.** Mediation analysis decomposing the total effect of offspring's education level on mothers' survival into the direct and indirect effects

|                                    | <b>Direct effect</b> | <b>Indirect effect via stage</b> |
|------------------------------------|----------------------|----------------------------------|
|                                    | HR (95% CI)          | HR (95% CI)                      |
| <b>Offspring's education level</b> |                      |                                  |
| >14 years                          | Reference            | Reference                        |
| 12-14 years                        | 1.13 (1.06 to 1.20)  | 1.01 (0.95 to 1.07)              |
| <12 years                          | 1.35 (1.25 to 1.44)  | 1.00 (0.94 to 1.06)              |

Models adjusted for mothers' income (tertile), offspring's income (tertile), mothers' education level, partners' education level, year of diagnosis, mothers' country of birth, marital status, number of children, sex of child, age of child in year prior to mother's diagnosis, proximity of residence between mother and child.

NB. Flexible parametric models did not converge when models included stage at diagnosis. As such, we used Cox regression to estimate hazard ratios (HR) and 95% confidence intervals (95% CI) of all-cause mortality, rather than relative survival, for these analyses.
